# Supplementary material for: A human monoclonal antibody blocks malaria transmission and defines a highly conserved neutralizing epitope on gametes
Source: PubMed Central journal article supplement (PMC7979743; doi:10.1038/s41467-021-21955-1), 2021-03-19
Supplement: 41467_2021_21955_MOESM1_ESM.pdf [file 41467_2021_21955_MOESM1_ESM.pdf]

## SUPPLEMENTARY MATERIAL (FIGURES AND TABLES)

### FIGURES

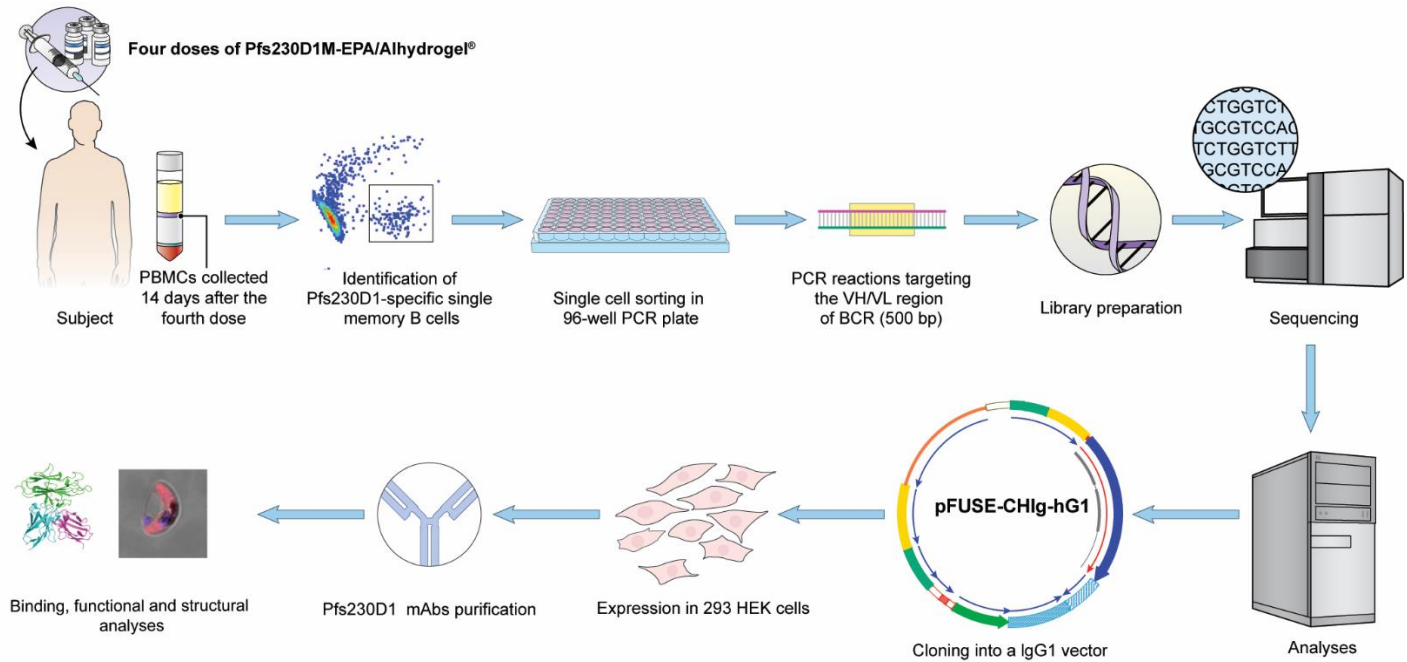

**Supplementary Fig. 1 | Experimental pipeline.** Pfs230D1-specific single B cells were sorted from PBMCs of eight Malian adults who had been immunized with four doses of 40 $\mu$ g of Pfs230D1-EPA/Alhydrogel®. After extraction of single B cells, a 500 bp fragment of the BCR variable regions of VH/VL were amplified and sequenced. Matched VH/VL pairs that were identified in more than one B cell were preferentially selected for cloning in an IgG1 vector for expression in 293 HEK cells and subsequent analyses.

BD FACSDiva 8.0.1

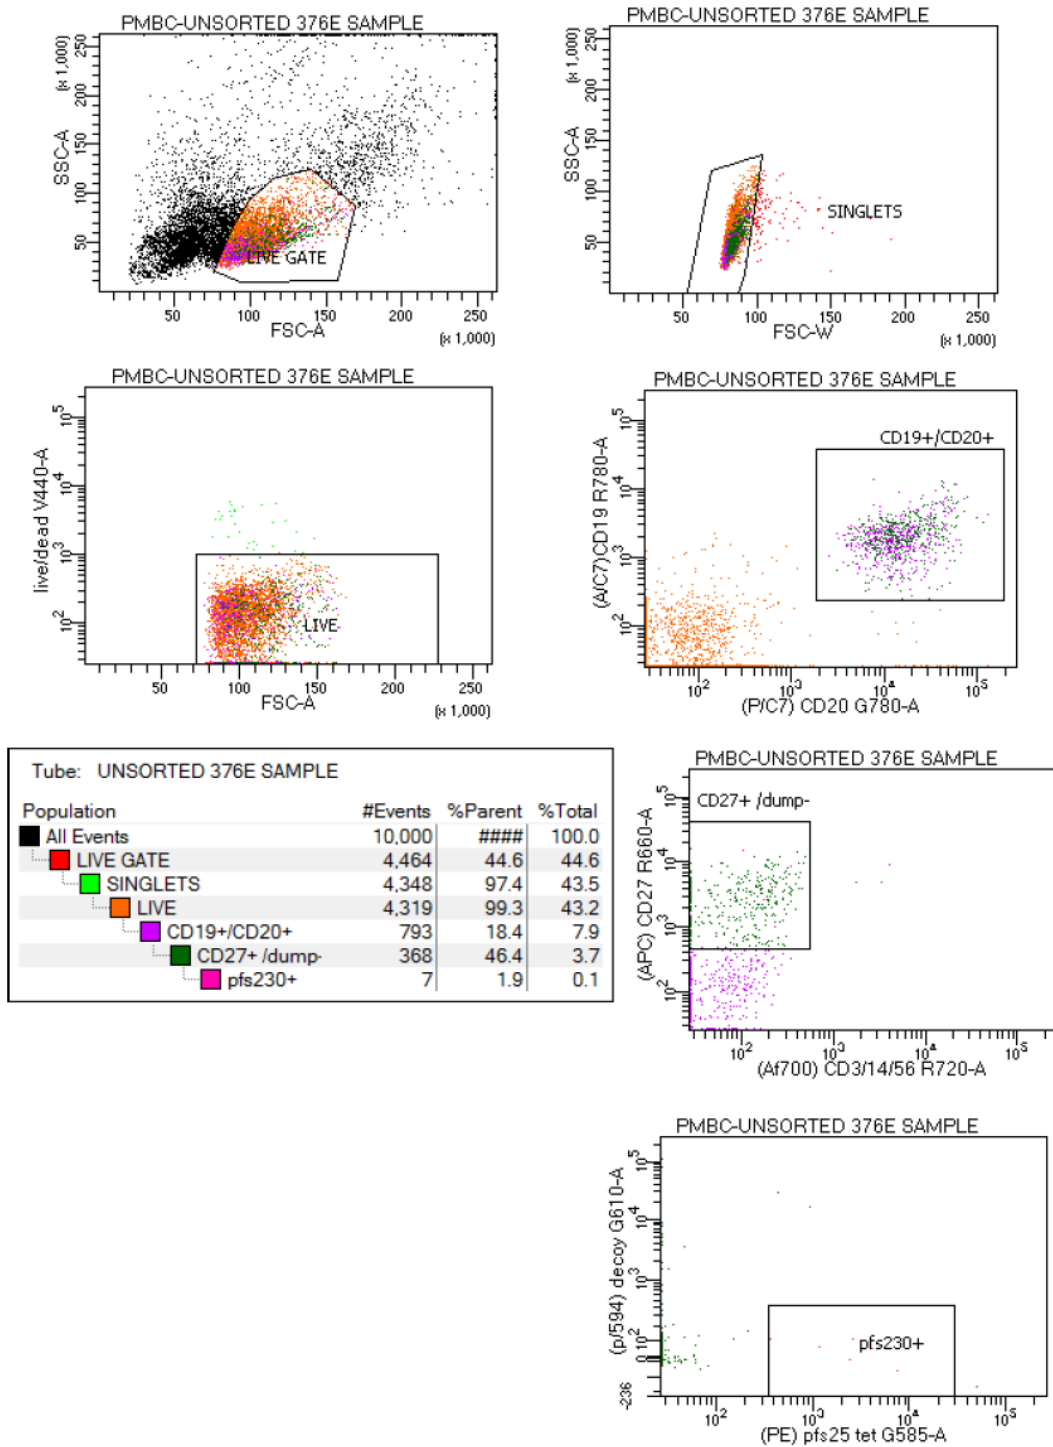

**Supplementary Fig. 2|** Flow cytometry gating strategy to sort Pfs230D1-specific B cells from PBMCs collected after 4 doses of Pfs230D1-EPA/Alhydrogel.

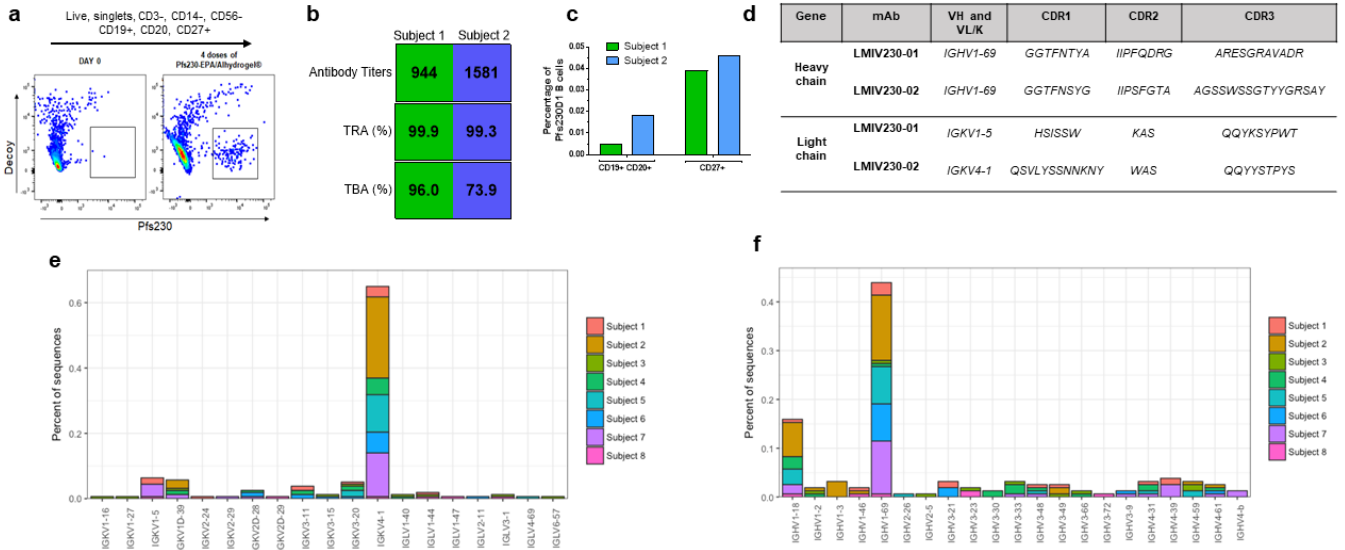

**Supplementary Fig. 3| Pfs230D1-specific mAbs belong to the same heavy chain germline subgroup but differ for kappa chain.**

**a**, Sorted memory B cells were gated as live, single cells, excluded for CD3, CD14 and CD56, and gated on CD19<sup>+</sup>, CD20<sup>+</sup>, CD27<sup>+</sup> cells. Then, a tetramer approach was used to select antigen-specific cells and reduce nonspecific binding. Cells binding to the decoy tetramer (BSA) were excluded and only those binding to Pfs230D1 were selected for sorting. **b**, Serum from each subject was used to measure antibody titers against Pfs230D1 and functional activity to reduce oocyst burden in Standard Membrane Feeding Assays (SMFA). TRA= Transmission Reducing Activity measured as the reduction in average oocyst count; TBA= Transmission Blocking Activity measured as the reduction in the proportion of infected mosquitoes. **c**, Proportion of memory B cells for each subject that are Pfs230D1-specific. Only one vial of PBMC was available, and this analysis was performed just once. **d**, Complementarity-determining regions (CDRs) of each sequence selected for mAb expression. **e**, IGKV4-1 germline (gene sequence in LMIV230-02) was the most frequent for the kappa chain genes. IGKV1-5 germline (gene sequence in LMIV230-01) was found in only three subjects. **f**, Sequences related to germline 1-69 of the IGHV gene were the most frequently elicited in response to the vaccination. Source data are provided as a Source Data file.

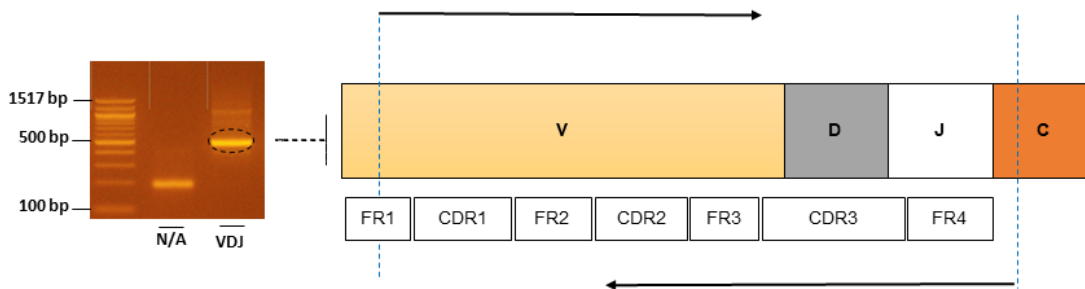

**Supplementary Fig. 4| Amplification of V(D)J region.** 500 bp fragment amplified from cDNA of sorted Pfs230D1-specific single B cell. This fragment was obtained using primers targeting the V(D)J region (iRepertoire Inc.).

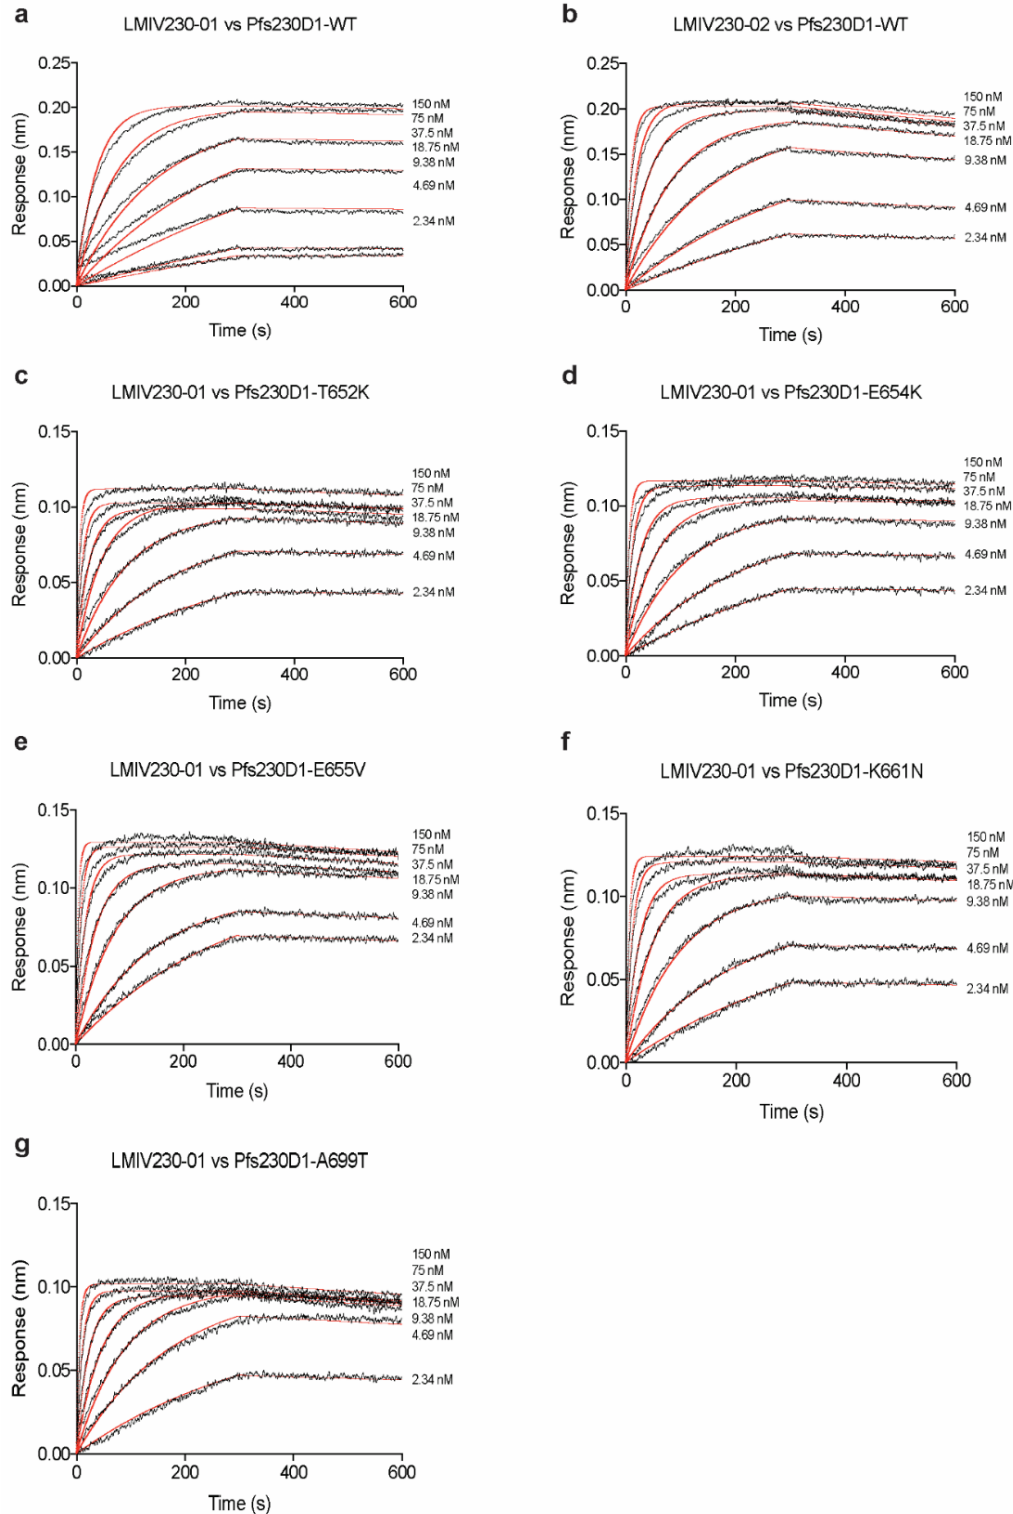

**Supplementary Fig 5| Affinity measurements of anti-Pfs230D1 mAbs to recombinant Pfs230D1 variants. a-b,** Representative sensorgrams of LMIV230-01 and LMIV230-02 to the recombinant Pfs230D1 wild type protein. **c-g,** Representative sensorgrams of LMIV230-1 to Pfs230D1 polymorphisms. Two biological replicates with three technical replicates each were performed. All sensorgrams were globally fitted with 1:1 binding interaction.

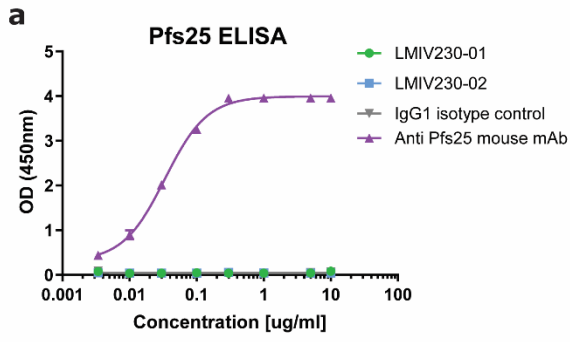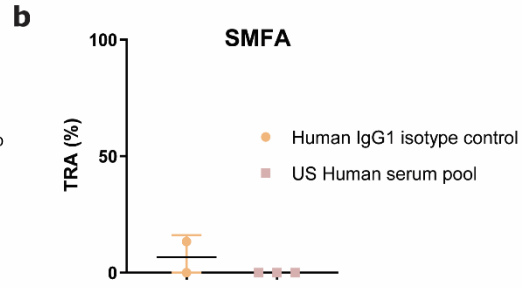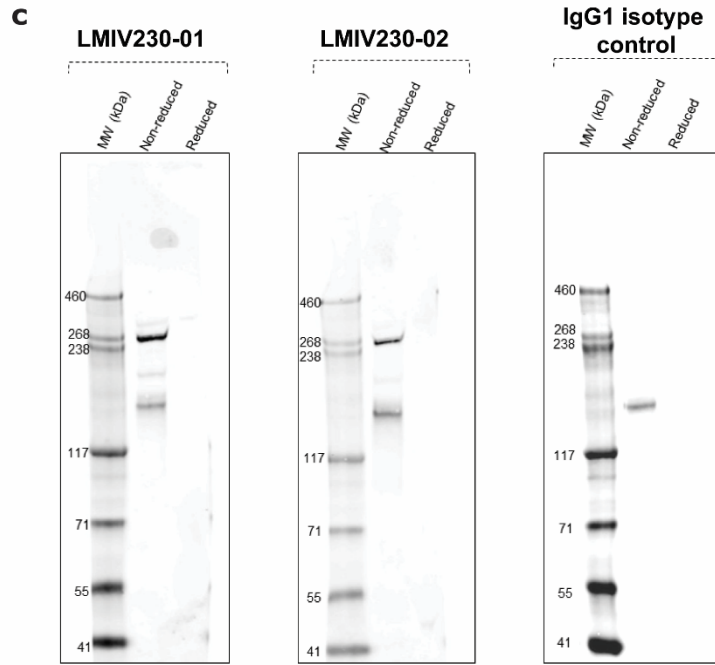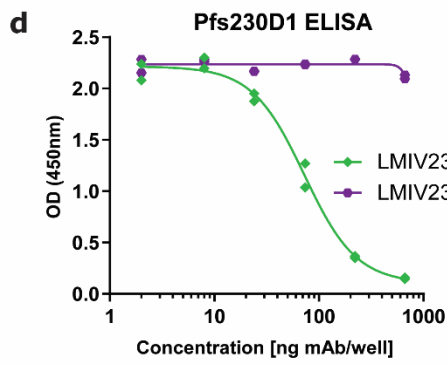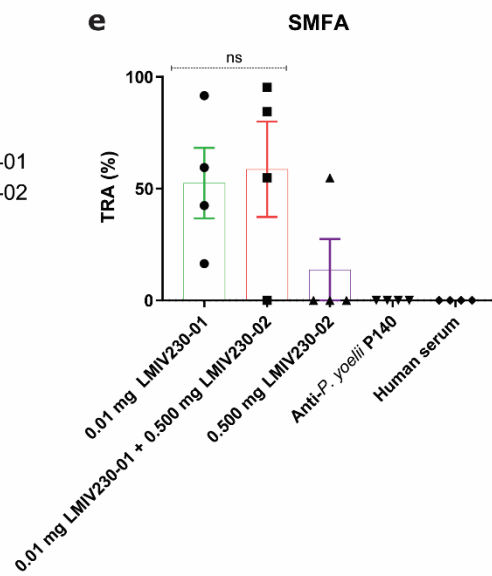

**Supplementary Fig.6| Additional binding and functional characterization of LMIV230-01 and -02. a,** Both mAbs failed to bind to the ookinete protein Pfs25. **b,** Additional controls for the Standard Membrane Feeding Assay (SMFA). Human IgG1 isotype control was expressed using the same conditions as LMIV230-01 and -02 and was used in this assay at 1000µg/mL. Sixty microliters of undiluted human pooled serum obtained from US healthy donors were used as additional control. Values are shown as mean ± s.e.m. **c,** Full depiction of the Western blot gel displayed in Fig. 1g. **d,** The two mAbs do not compete for the same epitope in the recombinant Pfs230D1 protein, since unlabelled LMIV230-01 blocks binding of LMIV-230-01-HRP to immobilized Pfs230D1 but LMIV230-02 does not. **e,** Combination of LMIV230-01 and LMIV230-02 did not increase functional activity over LMIV230-01 alone. Control mosquitoes were fed with mouse IgG1 mAb targeting *P. yoelii* P140 protein, or with non-immune human serum. Statistics were performed using One-Way ANOVA followed by Tukey's multiple comparisons. Bars represent mean and SEM. Source data are provided as a Source Data file.



| Subject         | Germline | QVQLVQSGAEVKKPGSSVKVSK | ASG | FTS | SYA | IS | VNRQAPGQGLEWMG | GIPIF | DT | NYA | QK | FQGR | VIT | ITADE | ST | STAY | MEL | SSL | RS | EDT | AVYY | CAR |    |
|-----------------|----------|------------------------|-----|-----|-----|----|----------------|-------|----|-----|----|------|-----|-------|----|------|-----|-----|----|-----|------|-----|----|
| Subject 1 - 213 | →        | v                      | nt  | il  | v   | a  | fgdgg          |       |    |     |    |      |     |       |    |      |     |     |    |     |      |     | 98 |
| Subject 2 - 182 | →        |                        |     |     |     |    |                |       |    |     |    |      |     |       |    |      |     |     |    |     |      |     | 81 |
| Subject 1 - 205 | →        |                        |     |     |     |    |                |       |    |     |    |      |     |       |    |      |     |     |    |     |      |     | 81 |
| Subject 1 - 207 |          |                        |     |     |     |    |                |       |    |     |    |      |     |       |    |      |     |     |    |     |      |     | 81 |
| Subject 1 - 210 |          |                        |     |     |     |    |                |       |    |     |    |      |     |       |    |      |     |     |    |     |      |     | 81 |
| Subject 1 - 211 |          |                        |     |     |     |    |                |       |    |     |    |      |     |       |    |      |     |     |    |     |      |     | 81 |
| Subject 2 - 155 |          |                        |     |     |     |    |                |       |    |     |    |      |     |       |    |      |     |     |    |     |      |     | 81 |
| Subject 2 - 156 |          |                        |     |     |     |    |                |       |    |     |    |      |     |       |    |      |     |     |    |     |      |     | 81 |
| Subject 2 - 157 |          |                        |     |     |     |    |                |       |    |     |    |      |     |       |    |      |     |     |    |     |      |     | 81 |
| Subject 2 - 161 |          |                        |     |     |     |    |                |       |    |     |    |      |     |       |    |      |     |     |    |     |      |     | 81 |
| Subject 2 - 164 |          |                        |     |     |     |    |                |       |    |     |    |      |     |       |    |      |     |     |    |     |      |     | 81 |
| Subject 2 - 166 |          |                        |     |     |     |    |                |       |    |     |    |      |     |       |    |      |     |     |    |     |      |     | 81 |
| Subject 2 - 167 |          |                        |     |     |     |    |                |       |    |     |    |      |     |       |    |      |     |     |    |     |      |     | 81 |
| Subject 2 - 169 |          |                        |     |     |     |    |                |       |    |     |    |      |     |       |    |      |     |     |    |     |      |     | 81 |
| Subject 2 - 172 |          |                        |     |     |     |    |                |       |    |     |    |      |     |       |    |      |     |     |    |     |      |     | 81 |
| Subject 2 - 179 |          |                        |     |     |     |    |                |       |    |     |    |      |     |       |    |      |     |     |    |     |      |     | 81 |
| Subject 2 - 180 |          |                        |     |     |     |    |                |       |    |     |    |      |     |       |    |      |     |     |    |     |      |     | 81 |
| Subject 2 - 183 |          |                        |     |     |     |    |                |       |    |     |    |      |     |       |    |      |     |     |    |     |      |     | 81 |
| Subject 2 - 189 |          |                        |     |     |     |    |                |       |    |     |    |      |     |       |    |      |     |     |    |     |      |     | 81 |
| Subject 2 - 190 |          |                        |     |     |     |    |                |       |    |     |    |      |     |       |    |      |     |     |    |     |      |     | 80 |
| Subject 2 - 194 |          |                        |     |     |     |    |                |       |    |     |    |      |     |       |    |      |     |     |    |     |      |     | 81 |
| Subject 2 - 195 |          |                        |     |     |     |    |                |       |    |     |    |      |     |       |    |      |     |     |    |     |      |     | 81 |
| Subject 2 - 196 |          |                        |     |     |     |    |                |       |    |     |    |      |     |       |    |      |     |     |    |     |      |     | 81 |
| Subject 2 - 198 |          |                        |     |     |     |    |                |       |    |     |    |      |     |       |    |      |     |     |    |     |      |     | 81 |
| Subject 2 - 199 |          |                        |     |     |     |    |                |       |    |     |    |      |     |       |    |      |     |     |    |     |      |     | 81 |
| Subject 2 - 200 |          |                        |     |     |     |    |                |       |    |     |    |      |     |       |    |      |     |     |    |     |      |     | 81 |
| Subject 3 - 49  |          |                        |     |     |     |    |                |       |    |     |    |      |     |       |    |      |     |     |    |     |      |     | 81 |
| Subject 4 - 112 |          |                        |     |     |     |    |                |       |    |     |    |      |     |       |    |      |     |     |    |     |      |     | 81 |
| Subject 5 - 113 |          |                        |     |     |     |    |                |       |    |     |    |      |     |       |    |      |     |     |    |     |      |     | 81 |
| Subject 5 - 116 |          |                        |     |     |     |    |                |       |    |     |    |      |     |       |    |      |     |     |    |     |      |     | 81 |
| Subject 5 - 117 |          |                        |     |     |     |    |                |       |    |     |    |      |     |       |    |      |     |     |    |     |      |     | 81 |
| Subject 5 - 118 |          |                        |     |     |     |    |                |       |    |     |    |      |     |       |    |      |     |     |    |     |      |     | 81 |
| Subject 5 - 120 |          |                        |     |     |     |    |                |       |    |     |    |      |     |       |    |      |     |     |    |     |      |     | 81 |
| Subject 5 - 121 |          |                        |     |     |     |    |                |       |    |     |    |      |     |       |    |      |     |     |    |     |      |     | 81 |
| Subject 5 - 122 |          |                        |     |     |     |    |                |       |    |     |    |      |     |       |    |      |     |     |    |     |      |     | 81 |
| Subject 5 - 126 |          |                        |     |     |     |    |                |       |    |     |    |      |     |       |    |      |     |     |    |     |      |     | 81 |
| Subject 5 - 129 |          |                        |     |     |     |    |                |       |    |     |    |      |     |       |    |      |     |     |    |     |      |     | 81 |
| Subject 5 - 131 |          |                        |     |     |     |    |                |       |    |     |    |      |     |       |    |      |     |     |    |     |      |     | 81 |
| Subject 5 - 132 |          |                        |     |     |     |    |                |       |    |     |    |      |     |       |    |      |     |     |    |     |      |     | 81 |
| Subject 5 - 133 |          |                        |     |     |     |    |                |       |    |     |    |      |     |       |    |      |     |     |    |     |      |     | 81 |
| Subject 6 - 136 |          |                        |     |     |     |    |                |       |    |     |    |      |     |       |    |      |     |     |    |     |      |     | 81 |
| Subject 6 - 138 |          |                        |     |     |     |    |                |       |    |     |    |      |     |       |    |      |     |     |    |     |      |     | 81 |
| Subject 6 - 141 |          |                        |     |     |     |    |                |       |    |     |    |      |     |       |    |      |     |     |    |     |      |     | 81 |
| Subject 6 - 142 |          |                        |     |     |     |    |                |       |    |     |    |      |     |       |    |      |     |     |    |     |      |     | 81 |
| Subject 6 - 143 |          |                        |     |     |     |    |                |       |    |     |    |      |     |       |    |      |     |     |    |     |      |     | 81 |
| Subject 6 - 144 |          |                        |     |     |     |    |                |       |    |     |    |      |     |       |    |      |     |     |    |     |      |     | 81 |
| Subject 6 - 146 |          |                        |     |     |     |    |                |       |    |     |    |      |     |       |    |      |     |     |    |     |      |     | 81 |
| Subject 6 - 148 |          |                        |     |     |     |    |                |       |    |     |    |      |     |       |    |      |     |     |    |     |      |     | 81 |
| Subject 6 - 149 |          |                        |     |     |     |    |                |       |    |     |    |      |     |       |    |      |     |     |    |     |      |     | 81 |
| Subject 6 - 151 |          |                        |     |     |     |    |                |       |    |     |    |      |     |       |    |      |     |     |    |     |      |     | 81 |
| Subject 6 - 153 |          |                        |     |     |     |    |                |       |    |     |    |      |     |       |    |      |     |     |    |     |      |     | 81 |
| Subject 6 - 154 |          |                        |     |     |     |    |                |       |    |     |    |      |     |       |    |      |     |     |    |     |      |     | 81 |
| Subject 7 - 218 |          |                        |     |     |     |    |                |       |    |     |    |      |     |       |    |      |     |     |    |     |      |     | 81 |
| Subject 7 - 219 |          |                        |     |     |     |    |                |       |    |     |    |      |     |       |    |      |     |     |    |     |      |     | 81 |
| Subject 7 - 220 |          |                        |     |     |     |    |                |       |    |     |    |      |     |       |    |      |     |     |    |     |      |     | 81 |
| Subject 7 - 221 |          |                        |     |     |     |    |                |       |    |     |    |      |     |       |    |      |     |     |    |     |      |     | 81 |
| Subject 7 - 223 |          |                        |     |     |     |    |                |       |    |     |    |      |     |       |    |      |     |     |    |     |      |     | 81 |
| Subject 7 - 224 |          |                        |     |     |     |    |                |       |    |     |    |      |     |       |    |      |     |     |    |     |      |     | 81 |
| Subject 7 - 226 |          |                        |     |     |     |    |                |       |    |     |    |      |     |       |    |      |     |     |    |     |      |     | 81 |
| Subject 7 - 230 |          |                        |     |     |     |    |                |       |    |     |    |      |     |       |    |      |     |     |    |     |      |     | 81 |
| Subject 7 - 231 |          |                        |     |     |     |    |                |       |    |     |    |      |     |       |    |      |     |     |    |     |      |     | 81 |
| Subject 7 - 233 |          |                        |     |     |     |    |                |       |    |     |    |      |     |       |    |      |     |     |    |     |      |     | 81 |
| Subject 7 - 234 |          |                        |     |     |     |    |                |       |    |     |    |      |     |       |    |      |     |     |    |     |      |     | 81 |
| Subject 7 - 238 |          |                        |     |     |     |    |                |       |    |     |    |      |     |       |    |      |     |     |    |     |      |     | 81 |
| Subject 7 - 239 |          |                        |     |     |     |    |                |       |    |     |    |      |     |       |    |      |     |     |    |     |      |     | 81 |
| Subject 7 - 244 |          |                        |     |     |     |    |                |       |    |     |    |      |     |       |    |      |     |     |    |     |      |     | 81 |
| Subject 7 - 246 |          |                        |     |     |     |    |                |       |    |     |    |      |     |       |    |      |     |     |    |     |      |     | 81 |
| Subject 7 - 248 |          |                        |     |     |     |    |                |       |    |     |    |      |     |       |    |      |     |     |    |     |      |     | 81 |
| Subject 7 - 250 |          |                        |     |     |     |    |                |       |    |     |    |      |     |       |    |      |     |     |    |     |      |     | 81 |
| Subject 7 - 251 |          |                        |     |     |     |    |                |       |    |     |    |      |     |       |    |      |     |     |    |     |      |     | 81 |
| Subject 8 - 39  |          |                        |     |     |     |    |                |       |    |     |    |      |     |       |    |      |     |     |    |     |      |     | 81 |

**Supplementary Fig.7| Mutations compared to IGHV1-69 germline sequence.** Figure shows CDR1 and CDR2 sequences from Pfs230D1-single memory B cells using IGHV1-69 V segment. Sequences from 8 individuals vaccinated with four doses Pfs230-EPA/Alhydrogel® are compared to the IGHV1-69\*01 germline from IMGT®. Any lower-case letter is a mutation, and there are approximately 10 aa mutations per sequence, suggesting they have undergone proliferation and selection in response to the vaccine. Specific changes (highlighted in red) at positions 24, 31, 35, 50, 57 and 58 are shared among most of sequences, and this could indicate that novel mutations in these positions have some functional importance for the antibodies, or alternatively that it is a novel allele.

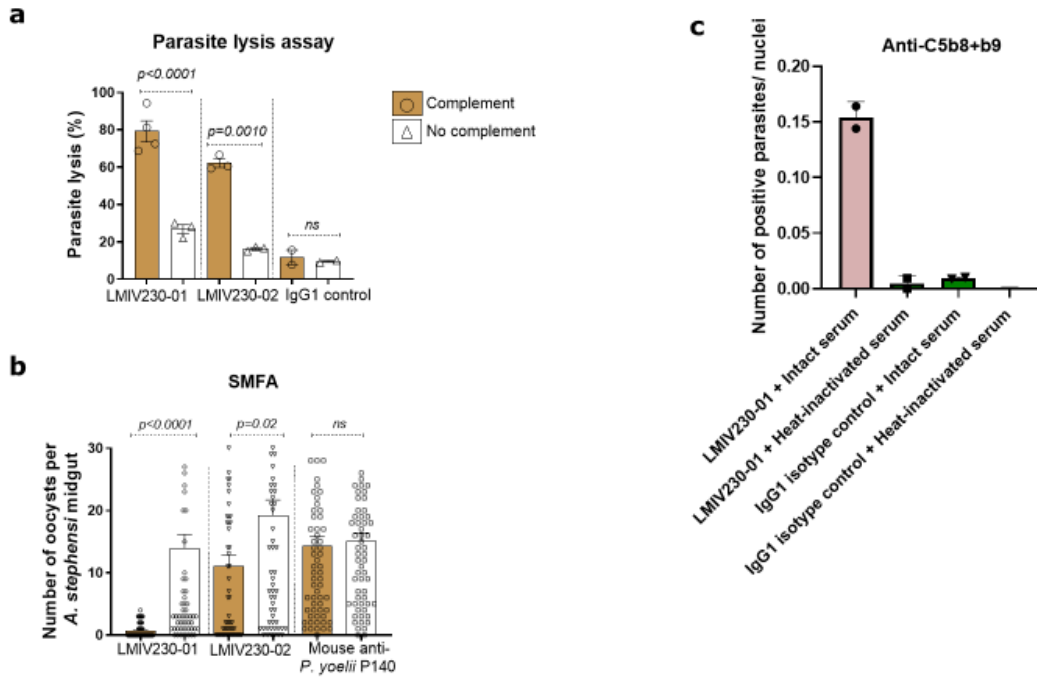

**Supplementary Fig.8| Pfs230 mAbs activity is complement-dependent and LMIV230-01 competing antibodies are acquired at varying levels by vaccinees.** **a**, Activity of LMIV230-01 and LMIV230-02 is complement-dependent in the vitro lysis assay and **b**, in the vivo mosquito feeding assay. **c**, Membrane attack complexes (MAC) on parasites were detected using an Alexa 488-labeled antibody that recognizes the assembled MAC complex (anti C5b-9+ C5b-8). Gametes incubated with LMIV230-01 and intact serum produced MAC-positive parasites. Heat-inactivating serum to degrade the heat-labile components of the complement pathway eliminated deposition of MAC on gametes. MAC-positive *P. falciparum* strain NF54 gametes were enumerated in a large, tiled confocal image and normalized to the number of Hoechst-stained nuclei. One-Way ANOVA followed by Tukey's multiple comparisons was used for a-c. Bars represent mean and SEM. Source data are provided as a Source Data file.



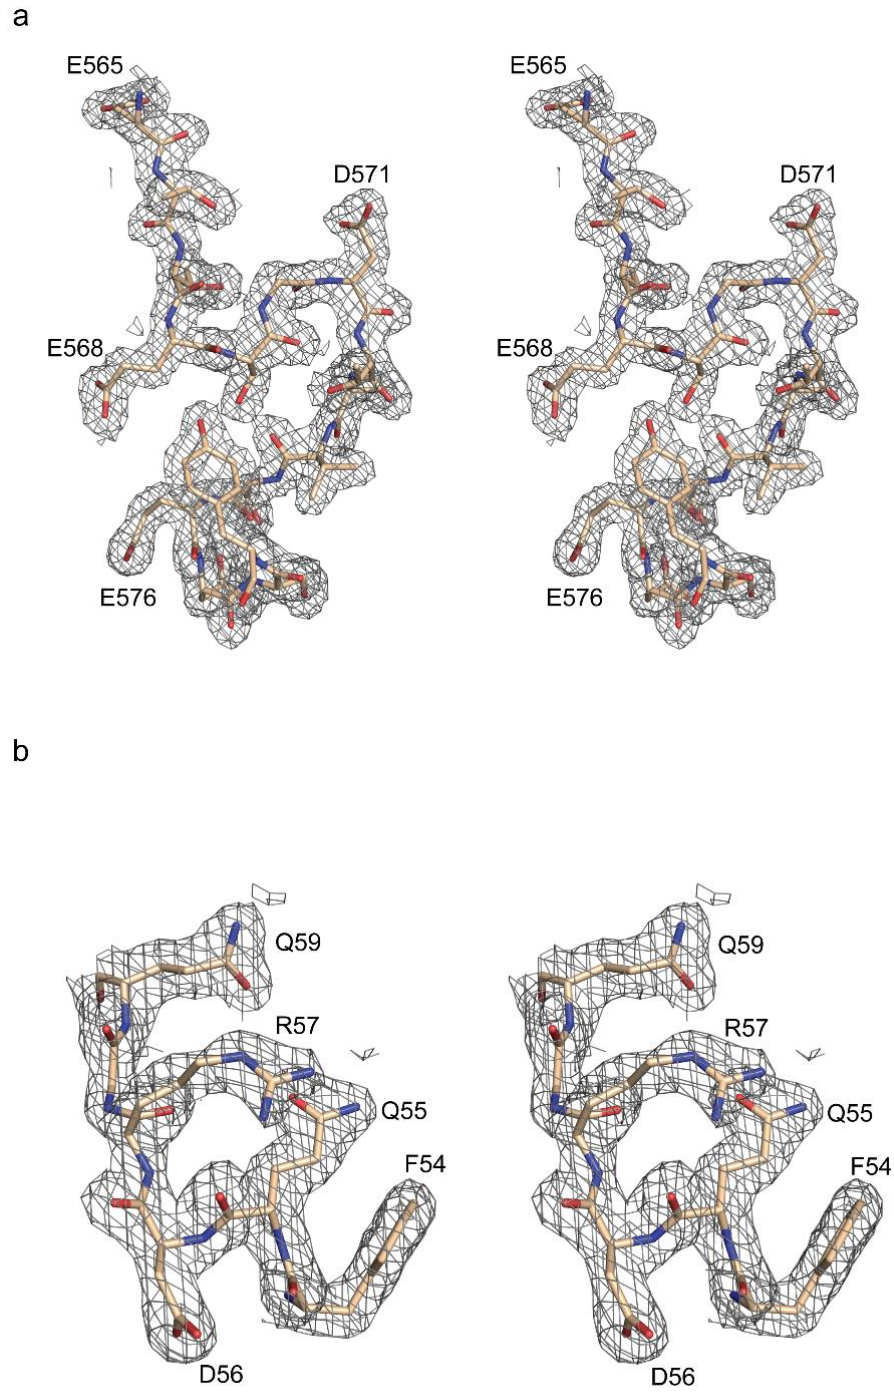

**Supplementary Fig. 9| Stereo view of representative electron density of the Pfs230D1-LMIV230-01scFv complex. a,  $2Fo-Fc$  map (gray mesh) of the N-terminal loop of Pfs230D1 (stick model) that interacts with LMIV230-01scFv at  $1.0 \sigma$  level. b,  $2Fo-Fc$  map (gray mesh) of the CDR3 region of LMIV230-01scFv heavy chain (stick model) at  $1.0 \sigma$  level.**

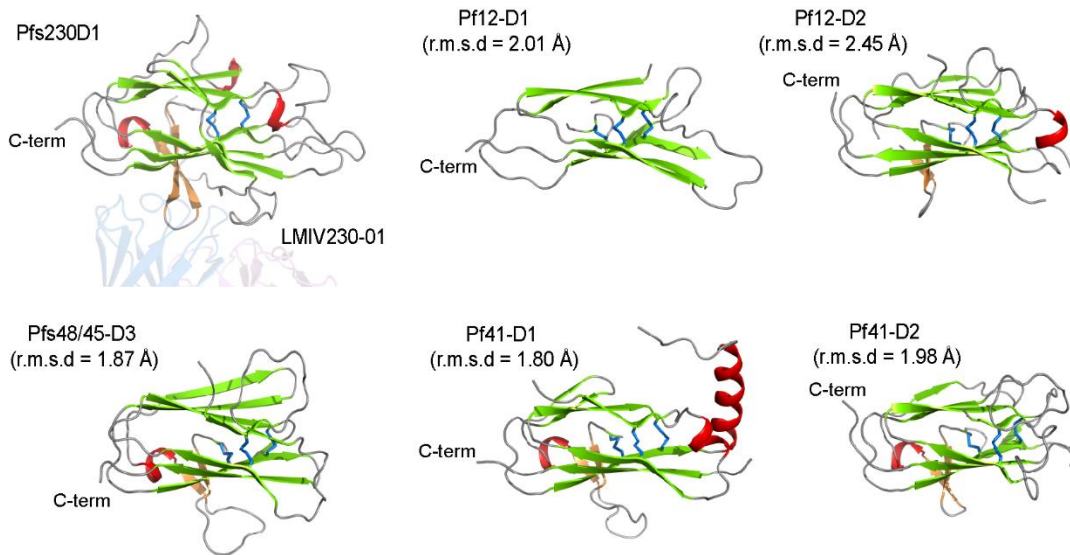

**Supplementary Fig. 10| Homology structures of Pfs230D1.** Secondary structure cartoon representation of Pfs230D1 in comparison to known 6-Cys domains of highest homology (Pf12, PDB:2YMO<sup>53</sup>; Pf41, PDB:4YS4<sup>54</sup>; Pfs48/45, PDB:6E62<sup>55</sup>). Beta-sandwiches in green, beta strands in orange, helices in red, loops in gray and disulfide bonds in blue sticks. LMIV230-01scFv is semi-transparent to show the binding epitope on Pfs230D1. The C-terminus of each structure is labelled. Root mean square deviations (r.m.s.d.) between Pfs230D1 (176 residues) and individual 6-Cys domains are shown.

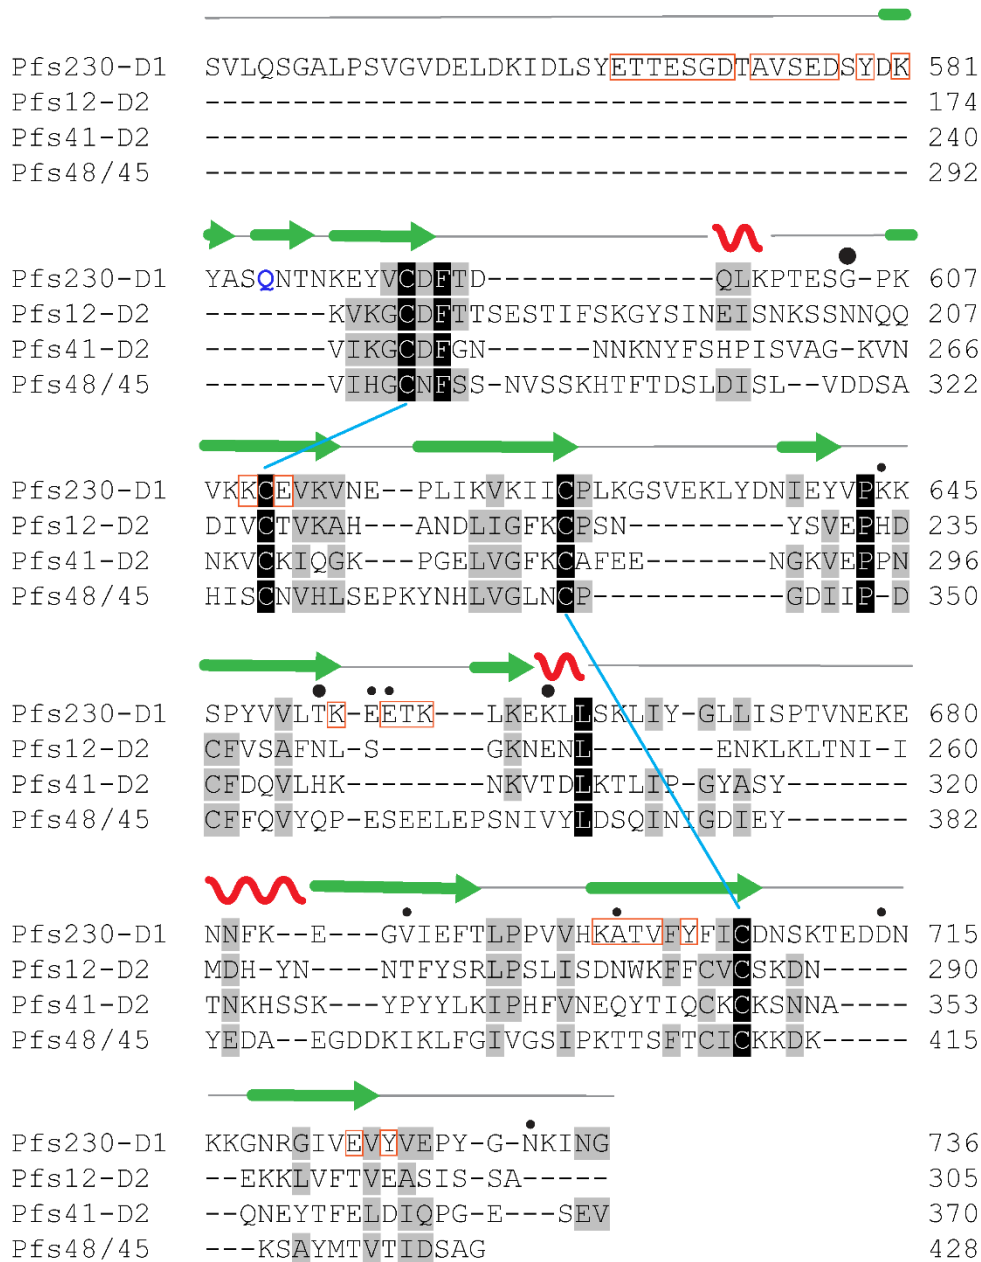

**Supplementary Fig. 11| Secondary structure sequence alignment of Pfs230D1 with proteins of highest structural similarity calculated by DALI server<sup>23</sup>.** Secondary structure elements of Pfs230D1 are shown with arrows and ribbons representing strands and helices, respectively. Disulfide bonds are linked with blue lines. Residues contacted by LMIV230-01scFv are in orange boxes. Mutation site (N585Q) to prevent N-glycosylation in *P. pastoris* is bolded in blue. Black circles above the sequence indicate polymorphisms. Bigger circles represent higher frequency.

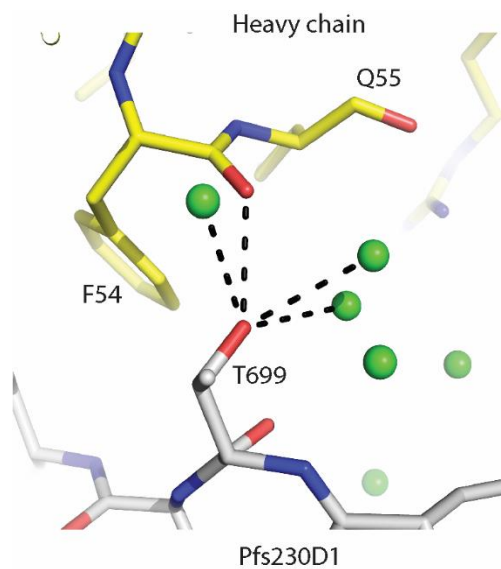

**Supplementary Fig. 12| Model of A699T mutant of Pfs230D1.** Amino acids are represented in stick models. Carbon in yellow (heavy chain of LMIV230-01)/grey (Pfs230D1); nitrogen in blue; oxygen in red. Water molecules are in green spheres. Potential interactions are drawn as dashed lines.





|            |                                                                                |     |
|------------|--------------------------------------------------------------------------------|-----|
| NF54       | SVLQSGALPSVGVDELDKIDLSEYETTESGDTAVSEDSYDKYASNNTNKEYVCDFTDQLKP                  | 601 |
| 20-2217-0  | SVLQSGALPSVGVDELDKIDLSEYETTESGDTAVSEDSYDKYASNNTNKEYVCDFTDQLKP                  | 601 |
| St.Lucia   | SVLQSGALPSVGVDELDKIDLSEYETTESGDTAVSEDSYDKYASNNTNKEYVCDFTDQLKP                  | 601 |
| *****      |                                                                                |     |
| NF54       | TESGPKVKKCEVKVNEPLIKVKIICPLKGSVEKLYDNIEYVPKKSPYVVLTKKEETKLKEK                  | 661 |
| 20-2217-0  | TES <b>S</b> PKVKKCEVKVNEPLIKVKIICPLKGSVEKLYDNIEYVPKKSPYVVLTKKEETKLKEK         | 661 |
| St.Lucia   | TES <b>S</b> PKVKKCEVKVNEPLIKVKIICPLKGSVEKLYDNIEYVPKKSPYVVLTKKEETKLKE <b>N</b> | 661 |
| ***.*****; |                                                                                |     |
| NF54       | LLSKLIYGLLISPTVNEKENNFKEGVIEFTLPPVVHKATVFYFICDNSKTEDDNKKGNRG                   | 721 |
| 20-2217-0  | LLSKLIYGLLISPTVNEKENNFKEGVIEFTLPPVVHKATVFYFICDNSKTEDDNKKGNRG                   | 721 |
| St.Lucia   | LLSKLIYGLLISPTVNEKENNFKEGVIEFTLPPVVHKATVFYFICDNSKTEDDNKKGNRG                   | 721 |
| *****      |                                                                                |     |
| NF54       | IVEVYVEPYGNKING                                                                | 736 |
| 20-2217-0  | IVEVYVEPYGNKING                                                                | 736 |
| St.Lucia   | IVEVYVEPYGNKING                                                                | 736 |
| *****      |                                                                                |     |

**Supplementary Fig. 14| Pfs230D1 polymorphisms in the other *P. falciparum* strains analyzed.** DNA sequencing revealed that the Malian isolate 20-2217-0 and St. Lucia strain contain the G605S/R polymorphism while St. Lucia also contains the K661N polymorphism; both polymorphisms reside outside the LMIV230-01 binding epitope.

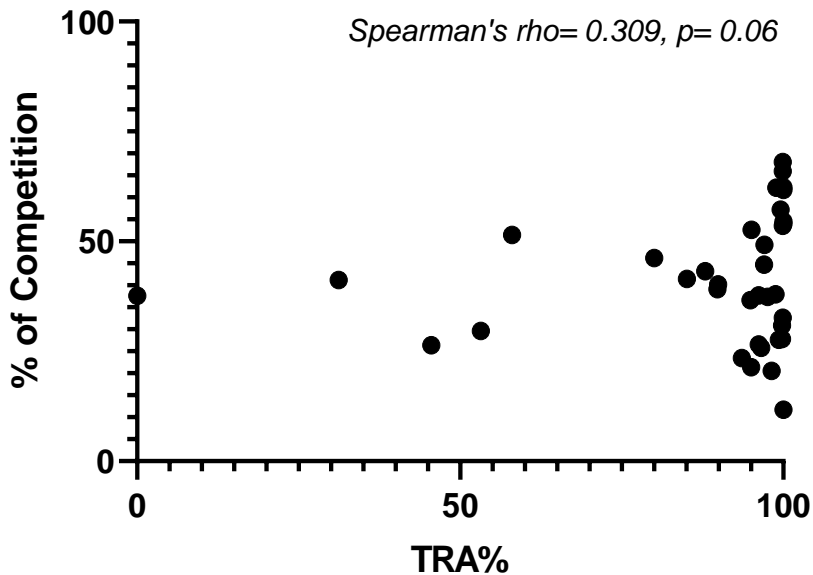

**Supplementary Fig. 15| Correlation between levels of LMIV230-01 competing antibodies and Transmission-Reducing Activity (TRA) measured in SMFA.** Source data are provided as a Source Data file.

## SUPPLEMENTARY MATERIAL

### TABLES

| Subject ID | Antibody titers | TRA (%) | TBA (%) |
|------------|-----------------|---------|---------|
| 1          | 944             | 99.9    | 96      |
| 2          | 1581            | 99.3    | 73.9    |
| 3          | 2115            | 100     | 100     |
| 4          | 1382            | 99.6    | 79.2    |
| 5          | 2100            | 100     | 100     |
| 6          | 5277            | 100     | 100     |
| 7          | 800             | 99.9    | 95.8    |
| 8          | 774             | 95.1    | 20.8    |

**Supplementary Table 1| Antibody titers and functional activity of sera from the eight subjects whose sequences were analyzed in this study.** TRA= Transmission-reducing activity.  
TBA=Transmission blocking activity.

|                               | $K_D$<br>(x $10^{-10} \pm$ SEM M) | $k_a$<br>(x $10^5 \pm$ SEM 1/Ms) | $k_{dis}$<br>(x $10^{-4} \pm$ SEM 1/s) | N |
|-------------------------------|-----------------------------------|----------------------------------|----------------------------------------|---|
| <b>LMIV230-01</b>             |                                   |                                  |                                        |   |
| <b>Biological Replicate 1</b> | 1.58 $\pm$ 0.77                   | 1.71 $\pm$ 0.06                  | 0.28 $\pm$ 0.15                        | 3 |
| <b>Biological Replicate 2</b> | 2.06 $\pm$ 0.99                   | 1.80 $\pm$ 0.04                  | 0.37 $\pm$ 0.18                        | 3 |
| <b>LMIV230-02</b>             |                                   |                                  |                                        |   |
| <b>Biological Replicate 1</b> | 6.36 $\pm$ 0.24                   | 7.67 $\pm$ 0.21                  | 4.87 $\pm$ 0.06                        | 3 |
| <b>Biological Replicate 2</b> | 4.27 $\pm$ 0.22                   | 6.37 $\pm$ 0.13                  | 2.71 $\pm$ 0.10                        | 3 |

**Supplementary Table 2| Binding of mAbs LMIV230-01 and LMIV230-02 to Pfs230D1 using Biolayer Interferometry.** Binding data for each mAb was fitted using a 1:1 binding model. The averages for two biological replicates, composed of three technical replicates each, are shown for both mAbs.

---

**Pfs230D1-LMIV230-01scFv**

---

**Data collection**

|                                    |                        |
|------------------------------------|------------------------|
| Space group                        | P3 <sub>1</sub>        |
| Cell dimensions                    |                        |
| <i>a</i> , <i>b</i> , <i>c</i> (Å) | 144.02 144.02 54.53    |
| $\alpha$ , $\beta$ , $\gamma$ (°)  | 90.00 90.00 120.00     |
| Resolution (Å)                     | 19.74-2.00 (2.07-2.00) |
| R <sub>meas</sub>                  | 0.16 (0.80)            |
| <i>I</i> / $\sigma$                | 5.34 (1.40)            |
| CC(1/2)                            | 98.70 (58.90)          |
| Completeness (%)                   | 99.43 (98.54)          |
| Redundancy                         | 3.22                   |

**Refinement**

|                                                     |             |
|-----------------------------------------------------|-------------|
| Resolution (Å)                                      | 19.74 – 2.0 |
| No. reflections                                     | 84,989      |
| <i>R</i> <sub>work</sub> / <i>R</i> <sub>free</sub> | 22.31/18.24 |
| No. atoms                                           |             |
| Protein                                             | 9,435       |
| Water                                               | 1,081       |
| <i>B</i> -factors                                   |             |
| Protein                                             | 34.26       |
| Water                                               | 39.66       |
| R.m.s. deviations                                   |             |
| Bond lengths (Å)                                    | 0.014       |
| Bond angles (°)                                     | 1.82        |
| Validation                                          |             |
| MolProbity score                                    | 1.35        |
| Clashscore                                          | 3.61        |
| Poor rotamers (%)                                   | 0.00        |
| Ramachandran plot                                   |             |
| Favored (%)                                         | 96.80       |
| Allowed (%)                                         | 3.20        |
| Disallowed (%)                                      | 0.00        |

---

**Supplementary Table 3| Data Collection and Refinement Statistics**

| <b>Residues</b> |                         | <b>Interface with</b> | <b>Residues in</b> |             |
|-----------------|-------------------------|-----------------------|--------------------|-------------|
| <b>in</b>       | <b>Interaction</b>      | <b>LMIV230-01scFv</b> | <b>LMIV230-</b>    | <b>CDRs</b> |
| <b>Pfs230D1</b> |                         |                       | <b>01scFv</b>      |             |
| E565            |                         | Light                 | Q1                 | -           |
| T566            |                         | Light                 | V2                 | -           |
| T567            |                         | Heavy, Light          | G27                | H1          |
| E568            |                         | Heavy                 | T28                | H1          |
| S569            | H-bond                  | Heavy                 | N30                | H1*         |
| G570            |                         | Heavy                 | T31                | H1*         |
| D571            |                         | Light                 | Y32                | H1          |
| A573            |                         | Heavy, Light          | A33                | H1          |
| V574            |                         | Heavy                 | I35                | H1*         |
| S575            |                         | Heavy                 | A50                | H2          |
| E576            | H-bond &<br>Salt bridge | Heavy                 | I52                | H2          |
| D577            |                         | Heavy                 | F54                | H2*         |
| Y579            |                         | Heavy                 | Q55                | H2*         |
| K581            |                         | Heavy                 | D56                | H2*         |
| K610            |                         | Heavy                 | R57                | H2*         |
| E612            |                         | Heavy                 | Q59                | H2*         |
| K653            | H-bond                  | Heavy                 | K74                | -           |
| E655            | H-bond                  | Heavy, Light          | K98                | H3*         |
| T656            |                         | Heavy, Light          | E99                | H3          |



|      |        |              |      |     |
|------|--------|--------------|------|-----|
| K657 | H-bond | Heavy, Light | S100 | H3  |
| K698 |        | Heavy        | G101 | H3  |
| A699 |        | Heavy        | R102 | H3  |
| T700 |        | Heavy        | A103 | H3  |
| V701 |        | Heavy        | R107 | H3* |
| Y703 |        | Heavy        | S173 | L1  |
| E724 |        | Heavy        | W175 | L1  |
| Y726 |        | Heavy        | Y192 | L2  |
|      |        |              | K193 | L2  |
|      |        |              | T196 | L2  |
|      |        |              | L197 | L2  |
|      |        |              | Y234 | L3  |
|      |        |              | K235 | L3* |
|      |        |              | S236 | L3  |
|      |        |              | Y237 | L3  |
|      |        |              | W239 | L3  |

**Supplementary Table 4 | Contact residues between Pfs230D1 and LMIV230-01scFv.** Asterisks (\*) refer to residues different from germline. CDRs= complementarity-determining regions.

| Polymorphisms  | Antibody contact | Frequency<br>(MalariaGen) | Frequency (%) |
|----------------|------------------|---------------------------|---------------|
| G605S or G605R | -                | 2,296 / 2,512             | 91.49 %       |
| K644Q          | -                | 1 / 2,512                 | 0.04 %        |
| T652R          | -                | 50 / 2,512                | 1.99 %        |
| E654K          | -                | 1 / 2,512                 | 0.04 %        |
| E655V          | +                | 6 / 2,512                 | 0.24 %        |
| K661N          | -                | 550 / 2,512               | 21.89 %       |
| V687I          | -                | 1 / 2,512                 | 0.04 %        |
| A699T          | +                | 5 / 2,512                 | 0.20 %        |
| D714N          | -                | 1 / 2,512                 | 0.04 %        |

---

**Supplementary Table 5| Polymorphisms within Pfs230D1.** Table was generated using 2,512 sequences of *P. falciparum* available at MalariaGen.

|       |                            | $K_D$<br>( $\times 10^{-10} \pm \text{SEM M}$ ) | $k_a$<br>( $\times 10^6 \pm \text{SEM 1/Ms}$ ) | $k_{dis}$<br>( $\times 10^{-5} \pm \text{SEM 1/s}$ ) | N |
|-------|----------------------------|-------------------------------------------------|------------------------------------------------|------------------------------------------------------|---|
| T652R | Biological<br>Replicates 1 | 1.50 $\pm$ 0.56                                 | 9.89 $\pm$ 0.9                                 | 0.96 $\pm$ 0.45                                      | 3 |
|       | Biological<br>Replicates 2 | 1.40 $\pm$ 0.59                                 | 12.12 $\pm$ 0.36                               | 1.7 $\pm$ 0.73                                       | 3 |
| A699T | Biological<br>Replicates 1 | 0.01 $\pm$ 0.00                                 | 10.34 $\pm$ 0.41                               | 0.01 $\pm$ 0.00                                      | 3 |
|       | Biological<br>Replicates 2 | 0.07 $\pm$ 0.06                                 | 10.31 $\pm$ 1.03                               | 0.07 $\pm$ 0.06                                      | 3 |
| E655V | Biological<br>Replicates 1 | 2.17 $\pm$ 0.33                                 | 9.15 $\pm$ 0.34                                | 1.99 $\pm$ 0.33                                      | 3 |
|       | Biological<br>Replicates 2 | 1.20 $\pm$ 0.20                                 | 13.47 $\pm$ 0.42                               | 1.62 $\pm$ 0.26                                      | 3 |
| K661N | Biological<br>Replicates 1 | 0.16 $\pm$ 0.15                                 | 8.16 $\pm$ 0.47                                | 0.12 $\pm$ 0.12                                      | 3 |
|       | Biological<br>Replicates 2 | 1.10 $\pm$ 0.18                                 | 11.2 $\pm$ 0.45                                | 0.72 $\pm$ 0.35                                      | 3 |
| E654K | Biological<br>Replicates 1 | 0.51 $\pm$ 0.07                                 | 9.81 $\pm$ 0.78                                | 0.50 $\pm$ 0.10                                      | 3 |
|       | Biological<br>Replicates 2 | 0.76 $\pm$ 0.03                                 | 11.40 $\pm$ 0.57                               | 0.86 $\pm$ 0.04                                      | 3 |

**Supplementary Table 6| Binding affinities of LMIV230-01 to Pfs230D1 variants as determined by BLI.** Binding data were fitted using a 1:1 binding model. The averages for three technical replicates are shown.

---

**LMIV230-01****LMIV230-02**

---

**heavy chain variable region**

QVQLVQSGAEVKKPGSSVKVSC  
KVS GGT FNTY AIIWVRQAPGQGL  
EWMGAIIPFQDRGQYAQKFQGR  
VTITADKSTSTAYMELSSLRSED  
AVYYCAKESGRAVADRWGQGT  
L VTVSS

**Heavy chain variable region**

QVQLVQSGAEVKKPGSSVKVSC  
KASGGTFNSYGISWVRQAPGQG  
LEWVGGIIPSFSGTADYAQKFQGR  
VTFTTDTSTSTAYMEVSSLRSED  
T AVYYCAGSSWSSGTYYGRSAYW  
GQGT L VTVSS

---

**Kappa chain variable region**

DIVMTQSPASLALSLGERATLYC  
RASHSISWLA WYQQKPGKAPKL  
LIYKASTLESGVPSRFSGSGSGT  
EFTLTISLQPD DFATYYCQQYK  
SYPWTFGQGTKLEIKR

**Kappa chain variable region**

EIVMTQSPASLALSLGERATINCK  
SSQSVLYSSNNKNYLA WYQQK  
P GQPPKLLIYWASTRESGVPDRFS  
GSGSGTDFTLTISLQAGDVA VY  
HCQQYYSTPYSFGQGTKLEIKR

---

**Supplementary Table 7 | Sequences of heavy and light chains correspondent to LMIV230-01 and LMIV230-02 mAbs.**

---

|                |                                                                                   |
|----------------|-----------------------------------------------------------------------------------|
| MBFor1         | 5' GAG GTG AAG AAG CCT GGG TCC TCG GTG AAG GTC TCC<br>TGC AAG GCT                 |
| MBRev1         | 5' GGT GCT AGC TGA GGA GAC CGT GAC CAG                                            |
| MBFor2         | 5' CAC ACG AAT TCG CAG GTC CAG CTG GTG CAG TCT GGG<br>GCT GAG GTG AAG AAG CCT GGG |
| MBfornodig1    | 5' AGT CTT GCA CTT GTC ACG AAT TCG CAG GTC CAG CTG<br>GTG CAG TCT                 |
| MBrevnodig1    | 5' TGG GCC CTT GGT GCT AGC TGA GGA GAC GGT CAC<br>CAG                             |
| MBkapfor1      | 5' TCC CTG GCT GTG TCT CTG GGC GAG AGG GCC ACC ATC<br>AAC TGC A                   |
| MBkaprev1      | 5' CTC CGT ACG TCG TTT GAT CTC CAG CTT GGT                                        |
| MBkaprev2      | 5' ACG AAT TCA GAC ATC GTG ATG ACC CAG TCT CCA GAC<br>TCC CTG GCT GTG TCT C       |
| MBkapfornodig1 | 5' AGT CTT GCA CTT GTC ACG AAT TCA GAM ATC GTG ATG<br>ACC CAG TCT                 |
| MBkaprevnodig1 | 5' AGA TGG TGC AGC CAC CGT TCG TTT GAT CTC CAG CTT                                |

---

**Supplementary Table 8| Primers used to complete sequence of antibody framework regions.**
